# Supplementary material for: A Systematic Review and Meta-Analysis of Automated Methods for Quantifying Enlarged Perivascular Spaces in the Brain
Source: bioRxiv or medRxiv preprint supplement (doi:10.1101/2024.03.04.24303705), 2024-03-04
Supplement: Supplementary file [file media-1.pdf]

# A Systematic Review and Meta-Analysis of Automated Methods for Quantifying Enlarged Perivascular Spaces in the Brain

## Supplementary Tables 1 and 3

Supplementary Table 1. Number and % of publications by year and type

|              | <b>All</b>      |                 | <b>Method</b>   |                 | <b>Improvement</b> |                 | <b>Application</b> |                 |
|--------------|-----------------|-----------------|-----------------|-----------------|--------------------|-----------------|--------------------|-----------------|
|              | <b><u>N</u></b> | <b><u>%</u></b> | <b><u>N</u></b> | <b><u>%</u></b> | <b><u>N</u></b>    | <b><u>%</u></b> | <b><u>N</u></b>    | <b><u>%</u></b> |
| 2002         | 1               | 0.87            | 1               | 2.08            | 0                  | 0               | 0                  | 0               |
| 2004         | 1               | 0.87            | 1               | 2.08            | 0                  | 0               | 0                  | 0               |
| 2008         | 2               | 1.74            | 2               | 4.17            | 0                  | 0               | 0                  | 0               |
| 2009         | 2               | 1.74            | 1               | 2.08            | 1                  | 12.5            | 0                  | 0               |
| 2011         | 1               | 0.87            | 1               | 2.08            | 0                  | 0               | 0                  | 0               |
| 2015         | 4               | 3.48            | 3               | 6.25            | 0                  | 0               | 1                  | 1.69            |
| 2016         | 8               | 6.96            | 7               | 14.58           | 0                  | 0               | 1                  | 1.69            |
| 2017         | 4               | 3.48            | 4               | 8.33            | 0                  | 0               | 0                  | 0               |
| 2018         | 6               | 5.22            | 6               | 12.5            | 0                  | 0               | 0                  | 0               |
| 2019         | 10              | 8.70            | 8               | 16.67           | 0                  | 0               | 2                  | 3.39            |
| 2020         | 11              | 9.56            | 3               | 6.25            | 1                  | 12.5            | 7                  | 11.86           |
| 2021         | 15              | 13.04           | 2               | 4.17            | 2                  | 25.00           | 11                 | 18.64           |
| 2022         | 22              | 19.13           | 7               | 14.58           | 1                  | 12.5            | 14                 | 23.73           |
| 2023         | 28              | 24.35           | 2               | 4.17            | 3                  | 37.5            | 23                 | 38.98           |
| <b>Total</b> | <b>115</b>      | <b>100</b>      | <b>48</b>       | <b>100</b>      | <b>8</b>           | <b>100</b>      | <b>59</b>          | <b>100</b>      |

Supplementary Table 3. PVS quantification assessment: accuracy metrics

| <b>Study</b>                                       | <b>Values of the accuracy metrics used</b>                                                                                |
|----------------------------------------------------|---------------------------------------------------------------------------------------------------------------------------|
| (Descombes et al., 2004)                           | Type I error (false positives) 13% and type II error (false negatives) 2.7%                                               |
| (Uchiyama et al., 2008)                            | AUC=0.945 to classify lacunar infarcts from PVS.                                                                          |
| (Uchiyama et al., 2009b)                           | AUC=0.945 to classify lacunar infarcts from PVS, sensitivity=93.3% and specificity=75% for detection of lacunar infarcts. |
| (González-Castro, Valdés Hernández, et al., 2016a) | Accuracy: SIFT: 82.34%, textons: 79.61%                                                                                   |
| (González-Castro, Valdés Hernández, et al., 2016b) | Accuracy = 80.03; True Negative Rate = 79.36; True Positive Rate = 80.67                                                  |
| (Park et al., 2016)                                | sensitivity = 0.69 (SD 0.09), PPV = 0.80 (SD 0.07)                                                                        |
| (Dubost et al., 2017)                              | TPR = 62.0, number of false positives = 1.5 and FDR = 31.4                                                                |
| (Hou et al., 2017)                                 | PPV 0.73 and SN 0.77                                                                                                      |
| (Zhang et al., 2017)                               | sensitivity = 0.65 (SD 0.04), PPV = 0.68 (SD 0.04)                                                                        |
| (Lian et al., 2018)                                | PPV 0.83 and SN 0.74                                                                                                      |

|                                     |                                                                                                                                                                                                                         |
|-------------------------------------|-------------------------------------------------------------------------------------------------------------------------------------------------------------------------------------------------------------------------|
| (Niazi et al., 2018)                | Automated PVS vs. visual counting = 0.77% false positive pixels<br>Automated PVS vs. visual counting = 19.39% false negative pixels                                                                                     |
| (Dubost, Adams, et al., 2019)       | MSE=4.85; MSE=4.65                                                                                                                                                                                                      |
| (Dubost, Dünwald, et al., 2019)     | MAE: CNN: 6.39 (CSO), 5.49 (BG), 3.0 (hippocampi); GP-U-Net: 5.58 (CSO), 5.67 (BG), 2.58 (hippocampi).                                                                                                                  |
| (Sudre et al., 2019)                | Sensitivity of 72.7%, median overlap positive agreement of 59% for boxes/voxels agreed by all raters, and 30% when at least one rater disagreed.                                                                        |
| (van Wijnen et al., 2019)           | On test set: EDM: FAUC=45.761, Sensitivity= 53.63; DGM: FAUC=50.757, Sensitivity= 55.26; IDM: FAUC=53.078, Sensitivity=55.35                                                                                            |
| (Dubost et al., 2020)               | Manual x Automated: FAUCs = 72.0 +- 13.3; Sensitivity = 62.1+-8.7; Average number of false positives = 2.33+-1.71, Average number of false negatives = 2.44+-2.01                                                       |
| (Smith et al., 2020)                | 83% of PVS match with the ground truth and 94% of the ground truth match with the segmentation.                                                                                                                         |
| (Ranti et al., 2022)                | Manual x Automated: Sensitivity = 82.9, Specificity = 91.9; Semi-automated x Semi-automated (two raters): inter-rater reliability = 97.8.                                                                               |
| (Spijkerman et al., 2022)           | Bland-Altman: smaller PVS count identified by automated method compared to human.                                                                                                                                       |
| (Sudre et al., 2022)<br>'BigrBrain' | F1=35.81, AED=14.50 ,AVD=45.30                                                                                                                                                                                          |
| (Sudre et al., 2022)<br>'Neurophet' | F1=0, AED=29, AVD=390.15                                                                                                                                                                                                |
| (Sudre et al., 2022)<br>'TeamTea'   | F1=17.12, AED=41, AVD=106.05                                                                                                                                                                                            |
| (Sudre et al., 2022)<br>'TheGPU'    | F1=38.92, AED=16, AVD=45.20                                                                                                                                                                                             |
| (Williamson et al., 2022)           | Accuracy/AUC of 0.802/0.834 on the training set, 0.768/0.847 on the validation set, and 0.897(95% CI = [0.758, 0.971])/0.879 on the test set. On the held-out test set, specificity=0.96, sensitivity=0.80, and F1=0.86 |
| (Lan et al., 2023)                  | FP = 0.0093 ± 0.0069. When trained using QC data, FP = 0.0020 ± 0.0026                                                                                                                                                  |
| (Rashid et al., 2023)               | sensitivity = 0.82, precision = 0.83                                                                                                                                                                                    |

---

*Legend: PVS: Perivascular Spaces, AUC: Area Under the (ROC) Curve, FAUC: F stat (ratio of two variances) of the AUC from two measurements (e.g. manual vs. automatic) CI: Confidence Interval, AED: Absolute Error Difference, AVD: Absolute Volume Difference, DSC: Dice Similarity Coefficient, FP: False Positives, PPV: Positive Predicted Value, MSE: Mean Squared Error, MAE: Mean Absolute Error, F1: accuracy metric that combines the precision and recall scores of a model by computing how many times a model made a correct prediction across the entire dataset, QC: Quality Control, TPR: True Positive Rate, FDR: False Discovery Rate, CNN: Convolutional Neural Network, SIFT: Scale Invariant Feature Transform*
