# Supplementary material for: A Systematic Review and Meta-Analysis of Automated Methods for Quantifying Enlarged Perivascular Spaces in the Brain
Source: bioRxiv or medRxiv preprint supplement (doi:10.1101/2024.03.04.24303705), 2024-03-04
Supplement: Supplementary file [file media-2.pdf]

Supplementary Table 2. Code availability

| Publication                                  | Pre-processing                                                                                                                                                                                                                                                                                                                                                                                                                                                                                                                              | Method                                                                                                                                                                                                                  |
|----------------------------------------------|---------------------------------------------------------------------------------------------------------------------------------------------------------------------------------------------------------------------------------------------------------------------------------------------------------------------------------------------------------------------------------------------------------------------------------------------------------------------------------------------------------------------------------------------|-------------------------------------------------------------------------------------------------------------------------------------------------------------------------------------------------------------------------|
| Kruggel et al. (2002) <sup>14</sup>          | Not provided                                                                                                                                                                                                                                                                                                                                                                                                                                                                                                                                | Not provided                                                                                                                                                                                                            |
| Descombes et al. (2004) <sup>15</sup>        | Not provided                                                                                                                                                                                                                                                                                                                                                                                                                                                                                                                                | Not provided                                                                                                                                                                                                            |
| Uchiyama et al. (2008) <sup>16</sup>         | Not provided                                                                                                                                                                                                                                                                                                                                                                                                                                                                                                                                | Not provided                                                                                                                                                                                                            |
| Wuerfel et al. (2008) <sup>17</sup>          | Not applicable                                                                                                                                                                                                                                                                                                                                                                                                                                                                                                                              | MedX discontinued                                                                                                                                                                                                       |
| Uchiyama et al. (2009) <sup>18</sup>         | Not provided                                                                                                                                                                                                                                                                                                                                                                                                                                                                                                                                | Not provided                                                                                                                                                                                                            |
| Ramirez et al. (2011) <sup>19</sup>          | Not applicable (part of the Lesion Explorer software)                                                                                                                                                                                                                                                                                                                                                                                                                                                                                       | <a href="https://github.com/sbips/sips">https://github.com/sbips/sips</a>                                                                                                                                               |
| Cai et al. (2015) <sup>20</sup>              | Not applicable                                                                                                                                                                                                                                                                                                                                                                                                                                                                                                                              | Matlab 2012b: <a href="https://www.mathworks.com">https://www.mathworks.com</a>                                                                                                                                         |
| Pereira et al. (2015) <sup>21</sup>          | Not provided                                                                                                                                                                                                                                                                                                                                                                                                                                                                                                                                | Not provided                                                                                                                                                                                                            |
| Ramirez et al. (2015) <sup>8</sup>           | Not applicable (part of the Lesion Explorer software)                                                                                                                                                                                                                                                                                                                                                                                                                                                                                       | <a href="https://github.com/sbips/sips">https://github.com/sbips/sips</a>                                                                                                                                               |
| Ballerini et al. (2016) <sup>22</sup>        | Brain extraction uses optiBET: <a href="https://montilab.psych.ucla.edu/fmri-wiki/optibet/">https://montilab.psych.ucla.edu/fmri-wiki/optibet/</a><br>White matter segmentation (FSL-FAST): <a href="https://fsl.fmrib.ox.ac.uk/fsl/fslwiki/FAST">https://fsl.fmrib.ox.ac.uk/fsl/fslwiki/FAST</a>                                                                                                                                                                                                                                           | Uses: <a href="https://www.mathworks.com/matlabcentral/fileexchange/24409-hessian-based-frangi-vesselness-filter">https://www.mathworks.com/matlabcentral/fileexchange/24409-hessian-based-frangi-vesselness-filter</a> |
| González-Castro et al. (2016a) <sup>23</sup> | Brain extraction uses optiBET: <a href="https://montilab.psych.ucla.edu/fmri-wiki/optibet/">https://montilab.psych.ucla.edu/fmri-wiki/optibet/</a> and FSL-FAST <a href="https://fsl.fmrib.ox.ac.uk/fsl/fslwiki/FAST">https://fsl.fmrib.ox.ac.uk/fsl/fslwiki/FAST</a><br>ROI segmentation uses FSL-SUSAN and FSL-FIRST: <a href="https://fsl.fmrib.ox.ac.uk/fsl/fslwiki/SUSAN">https://fsl.fmrib.ox.ac.uk/fsl/fslwiki/SUSAN</a> and <a href="https://fsl.fmrib.ox.ac.uk/fsl/fslwiki/FIRST">https://fsl.fmrib.ox.ac.uk/fsl/fslwiki/FIRST</a> | Not provided                                                                                                                                                                                                            |
| González-Castro et al. (2016b) <sup>24</sup> | Brain extraction uses optiBET: <a href="https://montilab.psych.ucla.edu/fmri-wiki/optibet/">https://montilab.psych.ucla.edu/fmri-wiki/optibet/</a> and FSL-FAST <a href="https://fsl.fmrib.ox.ac.uk/fsl/fslwiki/FAST">https://fsl.fmrib.ox.ac.uk/fsl/fslwiki/FAST</a>                                                                                                                                                                                                                                                                       | Not provided                                                                                                                                                                                                            |

|                                             |                                                                                                                                                                                                                                                                                                                                                                                                                                                                                                                                                                    |                                                                                                                                                                                                                                                                                                                                                                                                                                                                                                                                                              |
|---------------------------------------------|--------------------------------------------------------------------------------------------------------------------------------------------------------------------------------------------------------------------------------------------------------------------------------------------------------------------------------------------------------------------------------------------------------------------------------------------------------------------------------------------------------------------------------------------------------------------|--------------------------------------------------------------------------------------------------------------------------------------------------------------------------------------------------------------------------------------------------------------------------------------------------------------------------------------------------------------------------------------------------------------------------------------------------------------------------------------------------------------------------------------------------------------|
|                                             | ROI segmentation uses FSL-SUSAN and FSL-FIRST:<br><a href="https://fsl.fmrib.ox.ac.uk/fsl/fslwiki/SUSAN">https://fsl.fmrib.ox.ac.uk/fsl/fslwiki/SUSAN</a> and<br><a href="https://fsl.fmrib.ox.ac.uk/fsl/fslwiki/FIRST">https://fsl.fmrib.ox.ac.uk/fsl/fslwiki/FIRST</a>                                                                                                                                                                                                                                                                                           |                                                                                                                                                                                                                                                                                                                                                                                                                                                                                                                                                              |
| Park et al. (2016) <sup>25</sup>            | Not provided                                                                                                                                                                                                                                                                                                                                                                                                                                                                                                                                                       | Not provided                                                                                                                                                                                                                                                                                                                                                                                                                                                                                                                                                 |
| Wang et al. (2016a). <sup>9</sup>           | Analyze software: <a href="https://analyzedirect.com/">https://analyzedirect.com/</a>                                                                                                                                                                                                                                                                                                                                                                                                                                                                              | Analyze software: <a href="https://analyzedirect.com/">https://analyzedirect.com/</a>                                                                                                                                                                                                                                                                                                                                                                                                                                                                        |
| Zhang et al. (2016) <sup>26</sup>           | Skull-stripping uses FSL-BET:<br><a href="https://fsl.fmrib.ox.ac.uk/fsl/fslwiki/BET">https://fsl.fmrib.ox.ac.uk/fsl/fslwiki/BET</a><br>ROI segmentation uses FSL-FAST:<br><a href="https://fsl.fmrib.ox.ac.uk/fsl/fslwiki/FAST">https://fsl.fmrib.ox.ac.uk/fsl/fslwiki/FAST</a><br>Registration uses FSL-FLIRT:<br><a href="https://fsl.fmrib.ox.ac.uk/fsl/fslwiki/FLIRT">https://fsl.fmrib.ox.ac.uk/fsl/fslwiki/FLIRT</a>                                                                                                                                        | Not provided                                                                                                                                                                                                                                                                                                                                                                                                                                                                                                                                                 |
| Zong et al. (2016) <sup>27</sup>            | Bias field correction uses N3:<br><a href="http://www.bic.mni.mcgill.ca/software/N3/">http://www.bic.mni.mcgill.ca/software/N3/</a><br>Skull-stripping uses FSL-BET:<br><a href="https://fsl.fmrib.ox.ac.uk/fsl/fslwiki/BET">https://fsl.fmrib.ox.ac.uk/fsl/fslwiki/BET</a><br>ROI segmentation uses FSL-FAST:<br><a href="https://fsl.fmrib.ox.ac.uk/fsl/fslwiki/FAST">https://fsl.fmrib.ox.ac.uk/fsl/fslwiki/FAST</a><br>Registration uses FSL-FLIRT:<br><a href="https://fsl.fmrib.ox.ac.uk/fsl/fslwiki/FLIRT">https://fsl.fmrib.ox.ac.uk/fsl/fslwiki/FLIRT</a> | Frangi filter : <a href="https://uk.mathworks.com/matlabcentral/fileexchange/24409-hessian-based-frangi-vesselness-filter">https://uk.mathworks.com/matlabcentral/fileexchange/24409-hessian-based-frangi-vesselness-filter</a><br>OOF: <a href="https://uk.mathworks.com/matlabcentral/fileexchange/41612-optimally-oriented-flux-oof-for-3d-curvilinear-structure-detection">https://uk.mathworks.com/matlabcentral/fileexchange/41612-optimally-oriented-flux-oof-for-3d-curvilinear-structure-detection</a><br>Random forest implementation not provided |
| Dubost et al. (2017) <sup>28</sup>          | ROI Segmentation uses Freesurfer:<br><a href="https://surfer.nmr.mgh.harvard.edu/">https://surfer.nmr.mgh.harvard.edu/</a>                                                                                                                                                                                                                                                                                                                                                                                                                                         | Not provided                                                                                                                                                                                                                                                                                                                                                                                                                                                                                                                                                 |
| González-Castro et al. (2017) <sup>29</sup> | Brain extraction uses optiBET: <a href="https://montilab.psych.ucla.edu/fmri-wiki/optibet/">https://montilab.psych.ucla.edu/fmri-wiki/optibet/</a> and FSL-FAST<br><a href="https://fsl.fmrib.ox.ac.uk/fsl/fslwiki/FAST">https://fsl.fmrib.ox.ac.uk/fsl/fslwiki/FAST</a><br>ROI segmentation uses FSL-SUSAN and FSL-FIRST:<br><a href="https://fsl.fmrib.ox.ac.uk/fsl/fslwiki/SUSAN">https://fsl.fmrib.ox.ac.uk/fsl/fslwiki/SUSAN</a> and<br><a href="https://fsl.fmrib.ox.ac.uk/fsl/fslwiki/FIRST">https://fsl.fmrib.ox.ac.uk/fsl/fslwiki/FIRST</a>               | Not provided                                                                                                                                                                                                                                                                                                                                                                                                                                                                                                                                                 |
| Hou et al. (2017) <sup>30</sup>             | Non-local Haar filter implementation not provided<br>Noise reduction uses BM4D: <a href="https://webpages.tuni.fi/foi/GCF-BM3D/">https://webpages.tuni.fi/foi/GCF-BM3D/</a>                                                                                                                                                                                                                                                                                                                                                                                        | Frangi filter : <a href="https://uk.mathworks.com/matlabcentral/fileexchange/24409-hessian-based-frangi-vesselness-filter">https://uk.mathworks.com/matlabcentral/fileexchange/24409-hessian-based-frangi-vesselness-filter</a><br>OOF: <a href="https://uk.mathworks.com/matlabcentral/fileexchange/41612-optimally-oriented-flux-oof-for-3d-curvilinear-structure-detection">https://uk.mathworks.com/matlabcentral/fileexchange/41612-optimally-oriented-flux-oof-for-3d-curvilinear-structure-detection</a><br>Random forest implementation not provided |
| Zhang et al. (2017) <sup>31</sup>           | Skull-stripping uses FSL-BET:<br><a href="https://fsl.fmrib.ox.ac.uk/fsl/fslwiki/BET">https://fsl.fmrib.ox.ac.uk/fsl/fslwiki/BET</a>                                                                                                                                                                                                                                                                                                                                                                                                                               | Frangi filter : <a href="https://uk.mathworks.com/matlabcentral/fileexchange/24409-hessian-based-frangi-vesselness-filter">https://uk.mathworks.com/matlabcentral/fileexchange/24409-hessian-based-frangi-vesselness-filter</a>                                                                                                                                                                                                                                                                                                                              |

|                                              |                                                                                                                                                                                                                                                                                                                                                                                                                                                                                                                                                                                               |                                                                                                                                                                                                                                                                                                                           |
|----------------------------------------------|-----------------------------------------------------------------------------------------------------------------------------------------------------------------------------------------------------------------------------------------------------------------------------------------------------------------------------------------------------------------------------------------------------------------------------------------------------------------------------------------------------------------------------------------------------------------------------------------------|---------------------------------------------------------------------------------------------------------------------------------------------------------------------------------------------------------------------------------------------------------------------------------------------------------------------------|
|                                              | ROI segmentation uses FSL-FAST:<br><a href="https://fsl.fmrib.ox.ac.uk/fsl/fslwiki/FAST">https://fsl.fmrib.ox.ac.uk/fsl/fslwiki/FAST</a><br>Registration uses FSL-FLIRT:<br><a href="https://fsl.fmrib.ox.ac.uk/fsl/fslwiki/FLIRT">https://fsl.fmrib.ox.ac.uk/fsl/fslwiki/FLIRT</a>                                                                                                                                                                                                                                                                                                           | OOF: <a href="https://uk.mathworks.com/matlabcentral/fileexchange/41612-optimally-oriented-flux-oof-for-3d-curvilinear-structure-detection">https://uk.mathworks.com/matlabcentral/fileexchange/41612-optimally-oriented-flux-oof-for-3d-curvilinear-structure-detection</a><br>Random forest implementation not provided |
| Ballerini et al. (2018) <sup>32</sup>        | <a href="https://imaging.brainlab.ca/lesion-explorer.html">https://imaging.brainlab.ca/lesion-explorer.html</a>                                                                                                                                                                                                                                                                                                                                                                                                                                                                               | Uses: <a href="https://www.mathworks.com/matlabcentral/fileexchange/24409-hessian-based-frangi-vesselness-filter">https://www.mathworks.com/matlabcentral/fileexchange/24409-hessian-based-frangi-vesselness-filter</a>                                                                                                   |
| Boespflug et al. (2018) <sup>33</sup>        | DICOM to nifti (MRIConvert):<br><a href="https://surfer.nmr.mgh.harvard.edu/fswiki/mri_convert">https://surfer.nmr.mgh.harvard.edu/fswiki/mri_convert</a><br>Segmentation (Freesurfer): <a href="https://surfer.nmr.mgh.harvard.edu/">https://surfer.nmr.mgh.harvard.edu/</a><br>Bias field correction (Slicer): <a href="https://www.slicer.org/">https://www.slicer.org/</a><br>Co-registration (to T1w, 3DAllineate from AFNI):<br><a href="https://afni.nimh.nih.gov/pub/dist/doc/program_help/3dAllineate.html">https://afni.nimh.nih.gov/pub/dist/doc/program_help/3dAllineate.html</a> | Not provided                                                                                                                                                                                                                                                                                                              |
| Jung et al. (2018) <sup>34</sup>             | Not provided                                                                                                                                                                                                                                                                                                                                                                                                                                                                                                                                                                                  | Not provided                                                                                                                                                                                                                                                                                                              |
| Lian et al. (2018) <sup>35</sup>             | Not provided                                                                                                                                                                                                                                                                                                                                                                                                                                                                                                                                                                                  | Not provided                                                                                                                                                                                                                                                                                                              |
| Martinez-Ramirez et al. (2018) <sup>36</sup> | Not provided                                                                                                                                                                                                                                                                                                                                                                                                                                                                                                                                                                                  | Not provided                                                                                                                                                                                                                                                                                                              |
| Niazi et al. (2018) <sup>37</sup>            | Not provided                                                                                                                                                                                                                                                                                                                                                                                                                                                                                                                                                                                  | Not provided                                                                                                                                                                                                                                                                                                              |
| Dubost et al. (2019a) <sup>38</sup>          | Not provided                                                                                                                                                                                                                                                                                                                                                                                                                                                                                                                                                                                  | Not provided                                                                                                                                                                                                                                                                                                              |
| Dubost et al. (2019b) <sup>39</sup>          | Bias field correction: <a href="http://www.bic.mni.mcgill.ca/software/N3/">http://www.bic.mni.mcgill.ca/software/N3/</a><br>ROI Segmentation (Freesurfer): <a href="https://surfer.nmr.mgh.harvard.edu/">https://surfer.nmr.mgh.harvard.edu/</a>                                                                                                                                                                                                                                                                                                                                              | Not provided                                                                                                                                                                                                                                                                                                              |
| Dubost et al. (2019c) <sup>40</sup>          | ROI extraction: FSL FIRST and FAST:<br><a href="https://fsl.fmrib.ox.ac.uk/fsl/fslwiki">https://fsl.fmrib.ox.ac.uk/fsl/fslwiki</a>                                                                                                                                                                                                                                                                                                                                                                                                                                                            | Not provided                                                                                                                                                                                                                                                                                                              |
| Jung et al. (2019) <sup>41</sup>             | Not provided                                                                                                                                                                                                                                                                                                                                                                                                                                                                                                                                                                                  | Not provided                                                                                                                                                                                                                                                                                                              |
| Schwartz et al. (2019) <sup>42</sup>         | DICOM to nifti (MRIConvert):<br><a href="https://surfer.nmr.mgh.harvard.edu/fswiki/mri_convert">https://surfer.nmr.mgh.harvard.edu/fswiki/mri_convert</a><br>ROI Segmentation (Freesurfer): <a href="https://surfer.nmr.mgh.harvard.edu/">https://surfer.nmr.mgh.harvard.edu/</a><br>Bias field correction (Slicer3): <a href="https://www.slicer.org/">https://www.slicer.org/</a>                                                                                                                                                                                                           | Not provided                                                                                                                                                                                                                                                                                                              |

|                                                   |                                                                                                                                                                                                                                                                                         |                                                                                                                                                                                                                                                                                                                     |
|---------------------------------------------------|-----------------------------------------------------------------------------------------------------------------------------------------------------------------------------------------------------------------------------------------------------------------------------------------|---------------------------------------------------------------------------------------------------------------------------------------------------------------------------------------------------------------------------------------------------------------------------------------------------------------------|
| Sepehrband et al. (2019) <sup>43</sup>            | ROI Segmentation (Freesurfer): <a href="https://surfer.nmr.mgh.harvard.edu/">https://surfer.nmr.mgh.harvard.edu/</a><br>Co-registration: FSL FNIRT: <a href="https://fsl.fmrib.ox.ac.uk/fsl/fslwiki/FNIRT/">https://fsl.fmrib.ox.ac.uk/fsl/fslwiki/FNIRT/</a>                           | Can be requested from: <a href="https://sepehrband.github.io/mvp_doc/about/">https://sepehrband.github.io/mvp_doc/about/</a> . User guide: <a href="https://sepehrband.github.io/mvp_doc/pvs/">https://sepehrband.github.io/mvp_doc/pvs/</a>                                                                        |
| Sudre et al. (2019) <sup>44</sup>                 | Not provided                                                                                                                                                                                                                                                                            | Not provided                                                                                                                                                                                                                                                                                                        |
| Van Wijnen et al. (2019) <sup>45</sup>            | CSO Segmentation (Freesurfer): <a href="https://surfer.nmr.mgh.harvard.edu/">https://surfer.nmr.mgh.harvard.edu/</a>                                                                                                                                                                    | <a href="https://github.com/kimvwijnen/geodesic.distance.transform">https://github.com/kimvwijnen/geodesic.distance.transform</a>                                                                                                                                                                                   |
| Choi et al. (2020) <sup>46</sup>                  | ROI Segmentation (Freesurfer): <a href="https://surfer.nmr.mgh.harvard.edu/">https://surfer.nmr.mgh.harvard.edu/</a>                                                                                                                                                                    | <a href="https://github.com/hufsaim/pvsseg">https://github.com/hufsaim/pvsseg</a>                                                                                                                                                                                                                                   |
| Dubost et al. (2020) <sup>47</sup>                | ROI Segmentation (Freesurfer): <a href="https://surfer.nmr.mgh.harvard.edu/">https://surfer.nmr.mgh.harvard.edu/</a>                                                                                                                                                                    | Not provided                                                                                                                                                                                                                                                                                                        |
| Smith et al. (2020) <sup>48</sup>                 | Not applicable                                                                                                                                                                                                                                                                          | Uses: <a href="https://www.mathworks.com/matlabcentral/fileexchange/24409-hessian-based-frangi-vesselness-filter">https://www.mathworks.com/matlabcentral/fileexchange/24409-hessian-based-frangi-vesselness-filter</a><br>GUI: <a href="https://github.com/smithd37/pvssas">https://github.com/smithd37/pvssas</a> |
| Boutinaud et al. (2021) <sup>49</sup>             | ROI Segmentation (Freesurfer): <a href="https://surfer.nmr.mgh.harvard.edu/">https://surfer.nmr.mgh.harvard.edu/</a>                                                                                                                                                                    | <a href="https://github.com/pboutinaud/SHIVA_PVS">https://github.com/pboutinaud/SHIVA_PVS</a>                                                                                                                                                                                                                       |
| Yang et al. (2021) <sup>50</sup>                  | Not provided                                                                                                                                                                                                                                                                            | Not provided                                                                                                                                                                                                                                                                                                        |
| Ranti et al. (2022) <sup>51</sup>                 | ROI Segmentation (Freesurfer): <a href="https://surfer.nmr.mgh.harvard.edu/">https://surfer.nmr.mgh.harvard.edu/</a>                                                                                                                                                                    | GUI: <a href="https://github.com/smithd37/pvssas">https://github.com/smithd37/pvssas</a>                                                                                                                                                                                                                            |
| Spijkerman et al. (2022) <sup>52</sup>            | Co-registration: <a href="https://elastix.lumc.nl/">https://elastix.lumc.nl/</a>                                                                                                                                                                                                        | Not provided                                                                                                                                                                                                                                                                                                        |
| Sudre et al. (2022a) <sup>53</sup><br>'BigrBrain' | Co-registration (rigid to T1w): <a href="https://sourceforge.net/p/niftyreg/git/ci/master/tree/">https://sourceforge.net/p/niftyreg/git/ci/master/tree/</a><br>Bias field correction: <a href="http://www.bic.mni.mcgill.ca/software/N3/">http://www.bic.mni.mcgill.ca/software/N3/</a> | <a href="https://hub.docker.com/r/whereisvaldo/challenge2021/tags">https://hub.docker.com/r/whereisvaldo/challenge2021/tags</a> Tag: 1_PVS.bigrbrain, Digest: <a href="https://www.docker.com/doc/docker-digest">e5a67e374a66</a>                                                                                   |
| Sudre et al. (2022b) <sup>53</sup><br>'Neurophet' | Co-registration (rigid to T1w): <a href="https://sourceforge.net/p/niftyreg/git/ci/master/tree/">https://sourceforge.net/p/niftyreg/git/ci/master/tree/</a><br>Bias field correction: <a href="http://www.bic.mni.mcgill.ca/software/N3/">http://www.bic.mni.mcgill.ca/software/N3/</a> | <a href="https://hub.docker.com/r/whereisvaldo/challenge2021/tags">https://hub.docker.com/r/whereisvaldo/challenge2021/tags</a> Tag: 1_PVS.neurophet, Digest: <a href="https://www.docker.com/doc/docker-digest">0d1276bf5572</a>                                                                                   |
| Sudre et al. (2022c) <sup>53</sup><br>'TeamTea'   | Co-registration (rigid to T1w): <a href="https://sourceforge.net/p/niftyreg/git/ci/master/tree/">https://sourceforge.net/p/niftyreg/git/ci/master/tree/</a> Bias field correction: <a href="http://www.bic.mni.mcgill.ca/software/N3/">http://www.bic.mni.mcgill.ca/software/N3/</a>    | <a href="https://hub.docker.com/r/whereisvaldo/challenge2021/tags">https://hub.docker.com/r/whereisvaldo/challenge2021/tags</a> Tag: 1_PVS.teamtea, Digest: <a href="https://www.docker.com/doc/docker-digest">fd8f063b6fa9</a>                                                                                     |
| Sudre et al. (2022d) <sup>53</sup><br>'TheGPU'    | Co-registration (rigid to T1w): <a href="https://sourceforge.net/p/niftyreg/git/ci/master/tree/">https://sourceforge.net/p/niftyreg/git/ci/master/tree/</a> Bias field correction: <a href="http://www.bic.mni.mcgill.ca/software/N3/">http://www.bic.mni.mcgill.ca/software/N3/</a>    | <a href="https://hub.docker.com/r/whereisvaldo/challenge2021/tags">https://hub.docker.com/r/whereisvaldo/challenge2021/tags</a> Tag: 1_PVS.thegpu, Digest: <a href="https://www.docker.com/doc/docker-digest">7c3c622885c7</a>                                                                                      |

|                                        |                                                                                                                                                                                                                                                                                                                                                                                                                                                                                          |                                                                                     |
|----------------------------------------|------------------------------------------------------------------------------------------------------------------------------------------------------------------------------------------------------------------------------------------------------------------------------------------------------------------------------------------------------------------------------------------------------------------------------------------------------------------------------------------|-------------------------------------------------------------------------------------|
| Williamson et al. (2022) <sup>54</sup> | Data storage and de-identification use AMBRA: <a href="http://ambrahealth.com">http://ambrahealth.com</a><br>Aligning and skull-stripping use AFNI: <a href="https://afni.nimh.nih.gov/">https://afni.nimh.nih.gov/</a>                                                                                                                                                                                                                                                                  | <a href="https://github.com/willi3by/PVSNet">https://github.com/willi3by/PVSNet</a> |
| Lan et al. (2023)                      | Not provided. However, mentions publicly available tools like Freesurfer ( <a href="https://surfer.nmr.mgh.harvard.edu/">https://surfer.nmr.mgh.harvard.edu/</a> ), ITK snap for generating ground truth segmentations ( <a href="http://www.itksnap.org/pmwiki/pmwiki.php">http://www.itksnap.org/pmwiki/pmwiki.php</a> ), and co-registration to MNI space using FSL-FNIRT ( <a href="https://fsl.fmrib.ox.ac.uk/fsl/fslwiki/FNIRT">https://fsl.fmrib.ox.ac.uk/fsl/fslwiki/FNIRT</a> ) | Not provided                                                                        |
| Rashid et al. (2023)                   | Not provided                                                                                                                                                                                                                                                                                                                                                                                                                                                                             | Not provided                                                                        |
